# Supplementary material for: Frequency and clinical impact of CDKN2A/ARF/CDKN2B gene deletions as assessed by in-depth genetic analyses in adult T cell acute lymphoblastic leukemia
Source: Springer Nature journal article supplement (doi:10.1186/s13045-018-0639-8), 2018-07-24
Supplement: MOESM1 [file 15975164]

## **On line Supplemental Material and Methods**

### **Patients and samples**

Sixty-four newly diagnosed T-ALL cases, from which 62 had available clinical data were included in this study. Forty-three were males and 19 females, with a median age (range) of 36 years (16-72). T-ALL diagnosis was established locally according to World Health Organization (WHO) 2008 criteria, and the criteria proposed by Zurbier *et al* were used to define ETP-ALL (12/61, 20%). The EGIL (European Group for the Immunological Classification) criteria were used to define the immunologic subtype of T-ALL by central review of immunophenotypic data and reports. Patients were treated according to two consecutive MRD-oriented high-risk adult ALL PETHEMA protocols: ALL-HR-2003 (NCT00853008) and ALL-HR-11 (NCT01540812) (still ongoing). Most T-ALL patients were included in these two protocols, with the exception of those with cortical T-ALL with white blood cell (WBC) counts  $<100 \times 10^9/L$  who were considered as standard-risk ALL, and those aged  $>60$  years ( $n=4$ ), who were included in a protocol for elderly patients (ALL07OLD). Response to induction chemotherapy was evaluated by morphologic and flow cytometric studies of bone marrow. Good responders ( $<5\%$  blasts and MRD levels  $\leq 0.1\%$ ) proceeded to consolidation and maintenance chemotherapy. Poor responders ( $>5\%$  blasts and/or MRD  $\geq 0.1\%$ ) received intensification of induction treatment, followed by Allo-HSCT. As shown in Supplemental Figure S2, MRD assessment by flow cytometry was partially centralized in the ALL-HR-03 protocol and fully centralized in the ALL-HR-11 protocol, using the EuroFlow approach. Overall, complete remission (CR) was achieved in 58/62 cases (94%), 80% and 60% of whom showed MRD levels after induction  $\leq 0.1\%$  and  $\leq 0.01\%$ , respectively; 13/58 (22%) of patients were transplanted in first CR (Supplemental Table S4).

DNA from adult T-ALL bone marrow (BM) samples was obtained from the ALL research group collection (registered number: 2014999E000809), the Spanish National DNA Bank Carlos III (PT13/0001/0037 and PT13/0010/0067), La Fe Bio-bank (PT13/0010/0026) and collections from several PETHEMA hospitals. Samples were obtained in accordance with the principles of the Declaration of Helsinki and the Spanish legislation for protection of personal data and research on human samples, after patients provided their written informed consent. The study was approved by the Institutional Review Board of the Hospital Germans Trias i Pujol (Badalona, Spain).

### **Genomic qPCR assays**

qPCR assays were performed in a Light-Cycler®480 Real-time PCR system with the SYBR Green Master Mix chemistry (Roche Diagnostics, Mannheim, Germany), using primer sequences for the *CDKN2A/ARF* (exon 3), *CDKN2B* (exon 1) genes. Most alterations reported so far in cancer patients that involve the *CDKN2A* gene are accompanied by a parallel loss of

38 function of the *ARF* gene, due to the unusual structure of this gene locus. This prompted us to  
39 use primers that anneal on exon 3 of the *CDKN2A* gene which is also shared by the *ARF* gene.  
40 Reference genes (59KB and L1PA), and PCR conditions reported elsewhere. In case of  
41 trisomy 8, the L1PA together with the L1 (Terribas *et al.* manuscript in preparation) primers  
42 were used. Each reaction included 8 ng of DNA template, 5  $\mu$ l 2Xmaster mix, 1  $\mu$ mol/L of each  
43 primer in a total volume of 10  $\mu$ l. qPCR was performed in triplicate for each primer set and  
44 sample. Each set of PCR assays included both a negative control without template and a  
45 calibrator sample with a diploid (2N) DNA content. For qPCR data analysis, a previously  
46 published method based on qBase relative quantification, was used. Relative copy number  
47 (RCN) values were adjusted to the amount of normal residual DNA content (2N), as follows:  
48 DNA with no copies (0N) for the *CDKN2B/ARF/CDKN2A* locus (sample containing 100%  
49 blasts) was mixed with different amounts of normal DNA (2N) to obtain serial dilutions  
50 containing 80%, 60%, 40% and 20% of blasts DNA, and assessed by qPCR. A similar mixture  
51 with a pure heterozygous (1N) sample, was also made and analyzed in parallel. In both cases,  
52 the RCN values obtained displayed a linear correlation with the percentage of blasts  
53 (Supplemental Figure S3; A-B). Then, the RCN value corresponding to the percentage of  
54 contaminant cells was subtracted from the RCN value obtained for each individual sample, in  
55 case of contamination. To establish which linear regression curve should be applied per case, a  
56 cut-off value was defined to distinguish mono-allelic from bi-allelic deletions, using the mean  
57 RCN value of selected (pure) blast cell samples (Supplemental Table S5; A-B).

58

#### 59 **SNP-array studies.**

60 CNA were screened by CytoScan high-density arrays (Affymetrix, Santa Clara, CA) according  
61 to the manufacturer's instructions (average probe spacing of 700bp in exonic regions). CNA  
62 were detected and analyzed with the Chromosome Analysis Suite (ChAS 3.1) software provided  
63 by the manufacturer. CNA identified by <8 probes and <1Kb were not considered.  
64 Constitutional CN polymorphisms were excluded by filtering the data using the Affymetrix data  
65 on healthy controls DNA from 2,700 anonymous individuals across the globe), and the  
66 Database of Genomic Variants (<http://dgv.tcag.ca/dgv/app/home>).

67

#### 68 **Interphase fluorescence *in situ* hybridization (FISH) studies**

69 Interphase FISH analyses were performed on Carnoy fixed single cell suspensions made at the  
70 participating centers. FISH was carried out with the LSI *CDKN2A/CEP9* probe (Abbott, Santa  
71 Clara, CA) and a home-made bacterial artificial chromosome (BAC) probe (CHORI collection,  
72 RP11-467K20 and RP11-625H1), according to the manufacturer's instructions. Per sample,  
73  $\geq 100$  interphase nuclei were scored and a cut-off identified with the locus-specific probe of  
74  $>5\%$ , was used to define deletions in the *CDKN2A/ARF/CDKN2B* gene locus.

75 **Statistical analyses**

76 Quantitative variables were expressed as median (range), while frequencies were used for  
77 qualitative variables. For comparisons among groups (for categorical variables), the Chi-square  
78 or Fisher exact tests were used. OS was determined from the time of diagnosis to death or the  
79 last follow-up visit and OS curves were plotted by the Kaplan-Meier method; the log-rank test  
80 was used to evaluate the statistical significance of differences between OS curves. Multivariate  
81 analysis for OS was performed by the Cox proportional hazards regression model. All statistical  
82 analyses were carried out with the SPSS (Statistical Package for Social Sciences) package v24.0  
83 (IBM, Armonk, NY) and the R 3.3.2 software ([https://www.ibm.com/es-es/marketplace/spss-](https://www.ibm.com/es-es/marketplace/spss-statistics)  
84 [statistics](https://www.ibm.com/es-es/marketplace/spss-statistics)). For all statistical analyses; the level of significance was set at  $P < .05$ .

85

86 **Online Supplemental Table legends**

87

88 **Online Supplemental Table S1.** Frequency and type of *CDKN2A/ARF/CDKN2B* gene  
89 deletions as detected by qPCR in adult T-ALL (n=64).

90

91 **Online Supplemental Table S2.** Comparison between the CNA status of the *CDKN2A/ARF*  
92 and *CDKN2B* genes in adult T-ALL as assessed by qPCR, SNP-array and iFISH techniques.

93

94 **Online Supplemental Table S3.** Adult T-ALL: prognostic factors for overall survival.

95

96 **Online Supplemental Table S4.** Adult T-ALL patient characteristics at diagnosis and follow-  
97 up.

98

99 **Online Supplemental Table S5.** (A) RCN values obtained for the *CDKN2A/ARF* and *CDKN2B*  
100 genes in selected samples with a 100% blast cell content. (B). Most robust cut-off values to  
101 distinguish between normal, heterozygous and homozygous genotypes. The mean and standard  
102 deviation (SD) of the values obtained in panel A are indicated for each genotype.

103

104 **Online Supplemental Figure legends**

105

106 **Online Supplemental Figure S1.** Prognostic impact of the *CDKN2B* gene CNA status on  
107 overall survival of adult T-ALL patients (n=62). In panel A all *CDKN2B* gene deletions were  
108 analyzed together, while in panel B bi-allelic and mono-allelic *CDKN2B* gene deletions were  
109 separately considered.

110

111 **Online Supplemental Figure S2.** Flowchart summarizing the HR-20011 PETHEMA treatment  
112 protocol, including the time points at which MRD assessment was performed (highlighted in  
113 red).

114

115 **Online Supplemental Figure S3.** Calibration curves used to calculate RCN values according to  
116 the different percentage contamination of the sample by normal (i.e. non-blastic) cells. In panel  
117 A, a pure (100% blasts) homozygous sample was mixed with different amounts of normal (2N)  
118 DNA, as shown on the x-axis. RCN values are shown on the y-axis. In panel B a pure (100%)  
119 heterozygous sample was mixed with different amounts of normal (2N) DNA, as shown on the  
120 x-axis; RCN values are depicted on the y-axis.

121

122

123

124

125

126

**Table S1**

|                                 | <b>Bi-allelic deletion</b> | <b>Mono-allelic deletion</b> | <b>No-allelic deletion</b> | <b>Bi+mono deletion</b> |
|---------------------------------|----------------------------|------------------------------|----------------------------|-------------------------|
| <b><i>CDKN2A/ARF</i></b>        | 26/64 (41%)                | 6/64 (9%)                    | 32/64 (50%)                | 32/64 (50%)             |
| <b><i>CDKN2B</i></b>            | 22/64 (34%)                | 8/64 (12,5%)                 | 34/64 (53%)                | 30/64 (47%)             |
| <b><i>CDKN2A/ARF/CDKN2B</i></b> | 20/64 (31%)                | 2/64 (3%)                    | 29/64 (45%)                | 22/64 (34%)             |

13/64 cases (20%) presented distinct CNA status for the *CDKN2A/ARF* and *CDKN2B* genes.

**Table S2**

| Sample ID | % Blasts | CNA status (qPCR) |        | CNA status (SPN array) |        | iFISH results          |
|-----------|----------|-------------------|--------|------------------------|--------|------------------------|
|           |          | CDKN2A/ARF        | CDKN2B | CDKN2A/ARF             | CDKN2B |                        |
| 023T/D    | 100      | 1                 | 0      | 1                      | 0      | NE                     |
| 028T/D    | 100      | 0                 | 0      | 0                      | 0      | bi-allelic deletion    |
| AAA1      | 99       | 0                 | 0      | 0                      | 0      | bi-allelic deletion    |
| AAA5      | 100      | 2                 | 2      | 2                      | 2      | NE                     |
| AA17      | 96       | 0                 | 1      | 0                      | 1      | NE                     |
| AA21      | 84       | 0                 | 2      | 0                      | 2      | NE                     |
| AA33      | 43       | 0                 | 0      | 0                      | 0      | NE                     |
| AA36      | 60       | 1                 | 0      | 1                      | 0      | NE                     |
| AA39      | 98       | 0                 | 0      | 0                      | 0      | bi-allelic deletion    |
| AA45      | 98       | 0                 | 1      | 0                      | 1      | NE                     |
| AA54      | 100      | 0                 | 0      | 0                      | 0      | NE                     |
| AA78      | 95       | 0                 | 0      | 0                      | 0      | bi-allelic deletion ** |
| AA81      | 90       | 0                 | 0      | 0                      | 0      | NE                     |
| AAA7      | 95       | 0                 | 0      | 0                      | 0      | NE                     |
| 027T7D    | 100      | 2                 | 2      | 2                      | 2      | NE                     |
| AA19      | 70       | 2                 | 2      | 2                      | 2      | no deletion            |
| AA24      | 70       | 0                 | 0      | NE                     | NE     | bi-allelic deletion    |
| 021T/D    | 100      | 2                 | 2      | 2                      | 2      | NE                     |
| AA42      | 87       | 2                 | 2      | 2                      | 2      | NE                     |
| AA44      | 44       | 2                 | 2      | 2                      | 2      | NE                     |
| AA47      | 92       | 2                 | 2      | 2                      | 2      | NE                     |
| 036T/D    | 100      | 2                 | 2      | 2                      | 2      | NE                     |
| AA85      | 70       | 2                 | 2      | 2                      | 2      | NE                     |
| AA58      | 29       | 2                 | 2      | 2                      | 2      | NE                     |
| AA60      | 72       | 0                 | 2      | 0                      | 2      | NE                     |
| AA82      | 99       | 2                 | 2      | 2                      | 2      | NE                     |
| AA86      | 79       | 2                 | 2      | 2                      | 2      | NE                     |
| AA88      | 90       | 0                 | 2      | 0                      | 2      | NE                     |
| AA90      | 74       | 0                 | 0      | 0                      | 0      | NE                     |
| 054T/D    | 94       | 2                 | 2      | 2                      | 2      | no deletion            |
| 055T/D    | 72       | 0                 | 0      | 0                      | 0      | bi-allelic deletion    |
| AA94      | 100      | 2                 | 2      | 2                      | 2      | no deletion            |
| AA97      | 100      | 2                 | 2      | 2                      | 2      | no deletion            |
| A100      | 100      | 2                 | 2      | 2                      | 2      | NE                     |

0 corresponds to bi-allelic gene deletions; 1 to mono-allelic gene deletions and 2 to no gene deletion (normal genotype)

NE= not evaluated

\*\* home-made probe (CHORI BAC collection)

Figure S1

A

- Bi plus mono-allelic *CDKN2B* deletion (n=29)
- No *CDKN2B* deletion (n=33)

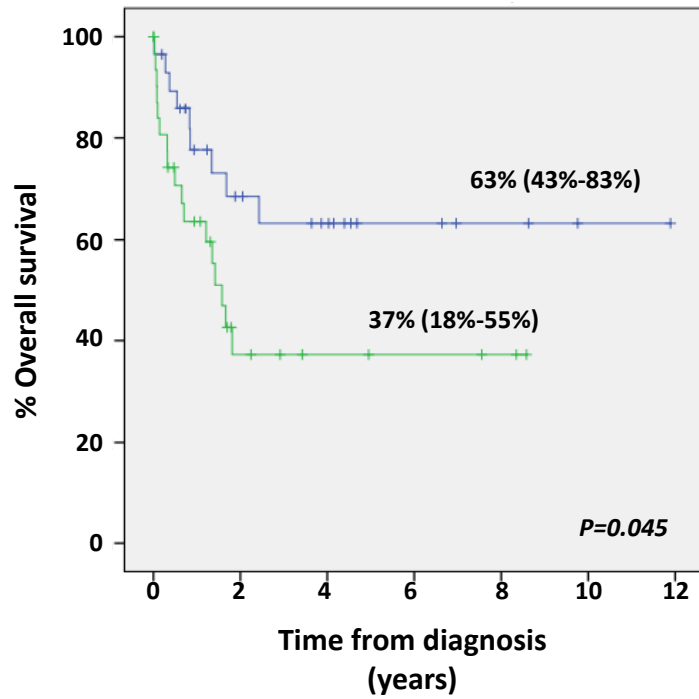

B

- Mono-allelic *CDKN2B* deletion (n=6)
- Bi-allelic *CDKN2B* deletion (n=23)
- No *CDKN2B* deletion (n=33)

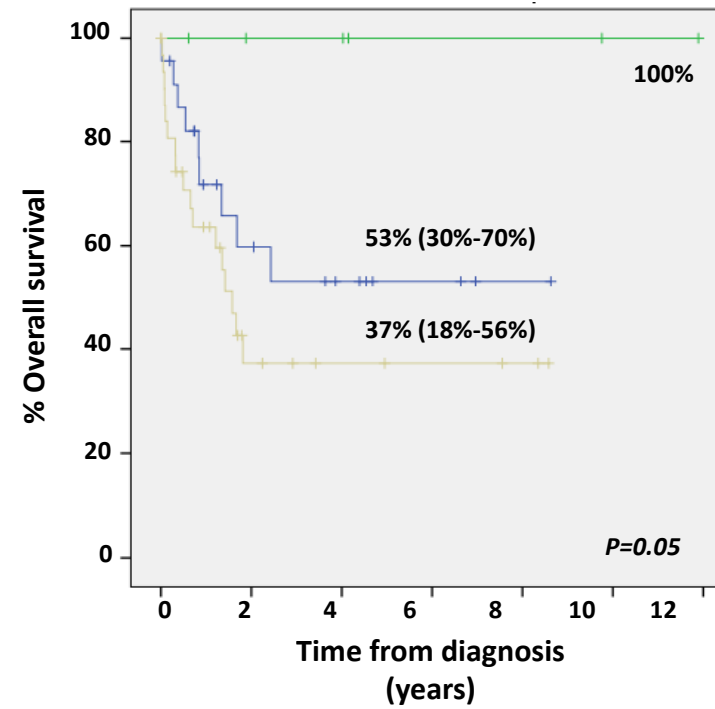

**Table S3**

|                                       | Univariate analysis |                     |         | Multivariate analysis |         |
|---------------------------------------|---------------------|---------------------|---------|-----------------------|---------|
|                                       | N                   | HR (95% CI)         | P-value | HR (95% CI)           | P-value |
| Non deleted CDKN2A/ARF                | 30/62               |                     | NS      |                       |         |
| Non deleted CDKN2B                    | 33/62               | 2.25 (0.99 ; 5.06)  | 0.05    |                       | NS      |
| Non deleted CDKN2A/ARF/CDKN2B         | 28/62               |                     | NS      |                       |         |
| Immunophenotype:                      |                     |                     | 0.04    |                       | NS      |
| ETP-ALL vs other immunophenotype      | 12/59               | 3.74 (1.32 ; 10.59) | 0.01    |                       |         |
| MRD $\geq$ 0.1% after first induction | 11/55               | 3.04 (1.20 ; 7.73)  | 0.02    | 3.08 (1.19 ; 7.94)    | 0.02    |

HR: hazard ratio; N: number of cases; NS: statistically not significant



Figure S2

PETHEMA HR2011-FLOW CHART

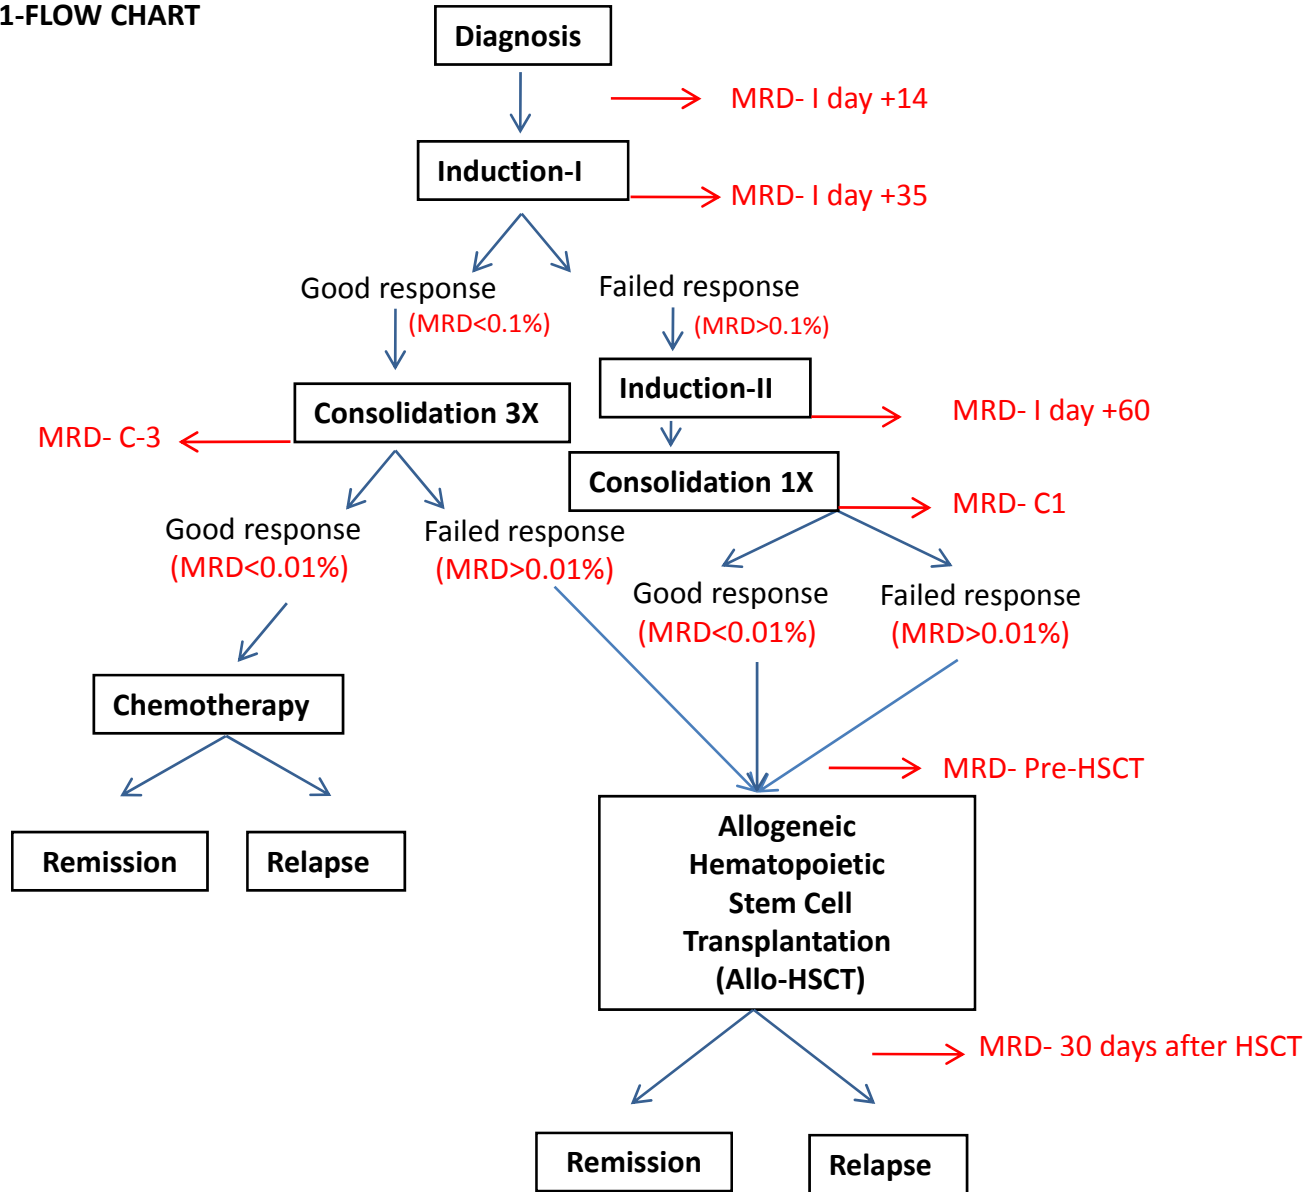

**Table S4**

**Patient characteristics at diagnosis and follow-up**

---

|                      |                    |
|----------------------|--------------------|
| Age (years ) [range] | 36 [16- 72]        |
| Gender, F/M (%)      | 19 (31%)/ 43 (69%) |

**Disease related features**

---

|                                    |                |
|------------------------------------|----------------|
| WBC count (x 10 <sup>9</sup> /L)   | 26.5 (0.6-431) |
| CNS involvement (Y/N/unknown)      | 6/ 55/ 1 (10%) |
| Overall cytogenetics:              |                |
| Complex karyotypes*                | 3 (5%)         |
| No complex                         | 49 (79%)       |
| Unknown                            | 10 (16%)       |
| Cytogenetic Subsets:               |                |
| del(6q)                            | 5 (9%)         |
| <i>TLX3</i> t(5;7)(q35;V)          | 2 (4%)         |
| <i>TLX1</i> t(10;14)(q24;q11)      | 1 (2%)         |
| <i>TAL1</i> del(1)(p22p32)         | 1 (2%)         |
| <i>LMO1</i> t(11;14)(p15;q11)      | 1 (2%)         |
| <i>KMT2A-ENL</i> t(11;19)(q23;p13) | 1 (2%)         |
| <i>CCND2</i> t(12;14)(p13.3;q11.2) | 1 (2%)         |
| Immunophenotypic subtype:          |                |
| ETP-ALL                            | 12 (20%)       |
| Pre-T/T II                         | 16 (26%)       |
| Cortical/T III                     | 19 (31%)       |
| Mature/T IV                        | 12 (20%)       |
| Unknown                            | 3 (5%)         |

**Treatment-related disease feaures**

---

|                                |                 |
|--------------------------------|-----------------|
| CR (Y/N)                       | 58/ 4 (94%)     |
| MRD <0.1% at CR (Y/N/unknown)  | 44/ 11/ 7 (80%) |
| MRD <0.01% at CR (Y/N/unknown) | 33/ 22/ 7 (60%) |
| Transplanted at first CR (Y/N) | 13/ 45 (22%)    |

Results expressed as number of cases (percentage) or as median (range)

M: male; F: female; MRD: minimal residual diseases; Y: yes; N: no; CR: complete remission.

\* ≥5 cytogenetic alterations

Figure S3

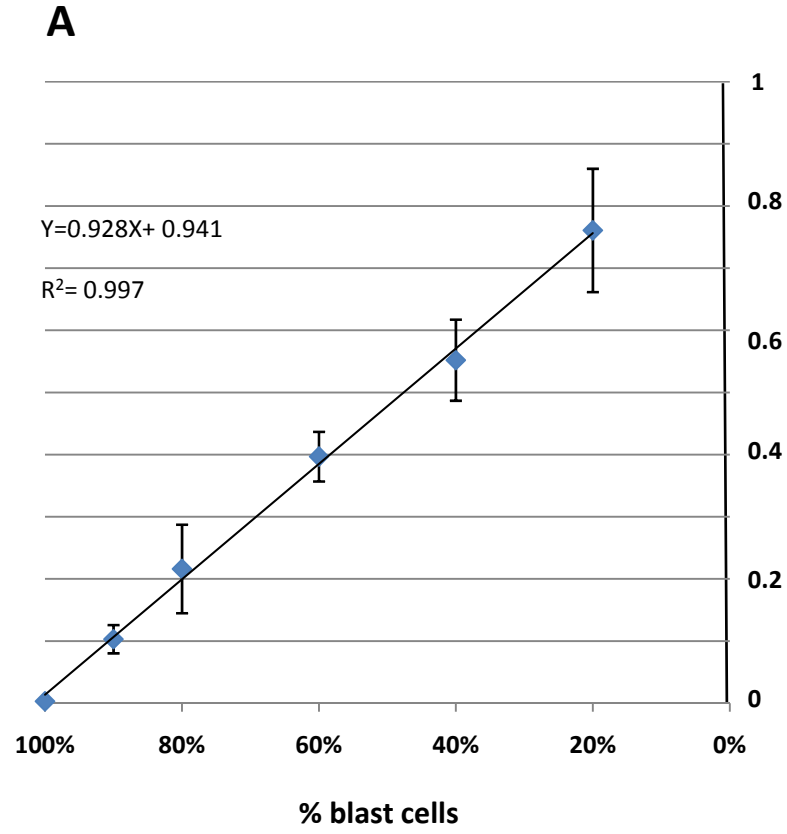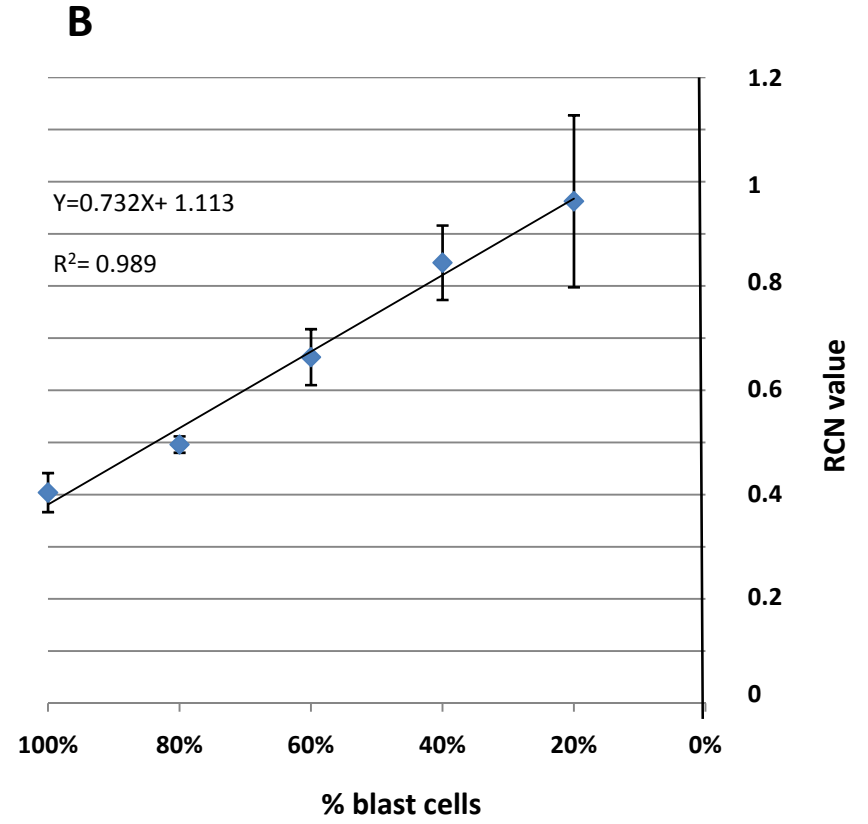

**Table S5**

**A**

| Sample ID | CDKN2A/ARF RCN | CDKN2B RCN |
|-----------|----------------|------------|
| 023T/D    | 0.5            | 0.0        |
| 028T/D    | 0.0            | 0.0        |
| AA54      | 0.1            | 0.1        |
| 009T/D    | 1.5            | 1.4        |
| 027T7D    | 1.6            | 1.7        |
| 021T/D    | 1.2            | 1.5        |
| 036T/D    | 1.4            | 1.2        |
| AA18      | 0.5            | 1.5        |
| AA51      | 0.0            | 0.0        |
| AA70      | 1.3            | 1.4        |
| A100      | 0.9            | 0.6        |
| A104      | 1.3            | 1.1        |
| A101      | 0.2            | 0.1        |
| A103      | 1.4            | 1.1        |
| A111      | 1.1            | 1.3        |
| AA76      | 0.0            | 0.0        |
| AA94      | 0.8            | 0.9        |
| A118      | 0.2            | 0.1        |
| A102      | 1.0            | 0.9        |

**B**

| <b>CDKN2A/ARF/CDKN2B locus RCN (mean ±SD)</b> |            |
|-----------------------------------------------|------------|
| <b>No-allelic deletions (n=22)</b>            |            |
| Mean ±SD                                      | 1.25 ±0.23 |
| Mean-2 SD                                     | <b>0.8</b> |
| <b>Mono-allelic deletions (n=3)</b>           |            |
| Mean ±SD                                      | 0.53 ±0.08 |
| Mean-2 SD                                     | <b>0.4</b> |
| <b>Bi-allelic deletions (n=13)</b>            |            |
| Mean ±SD                                      | 0.06 ±0.06 |
| Mean-2 SD                                     | -0.1       |
